# Supplementary material
Source: PubMed Central journal article supplement (PMC4278242)

**H&E**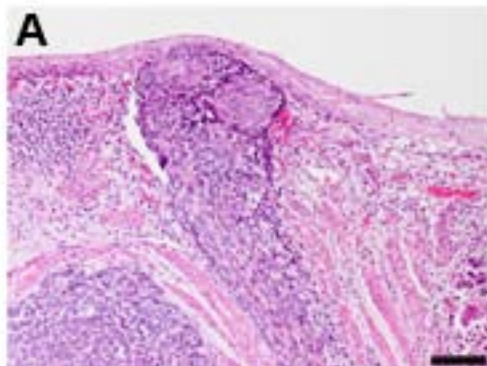**p120ctn**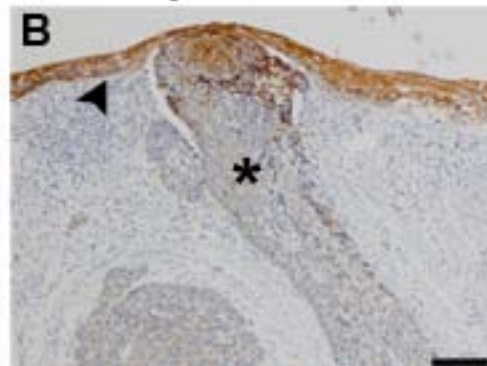**EGFR**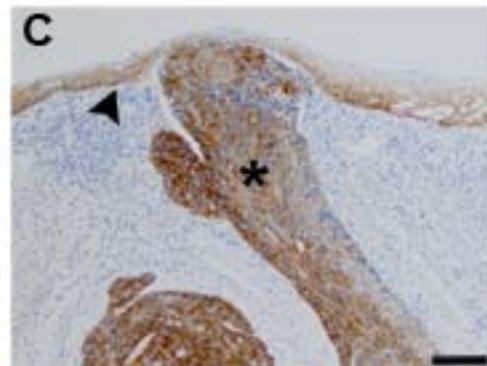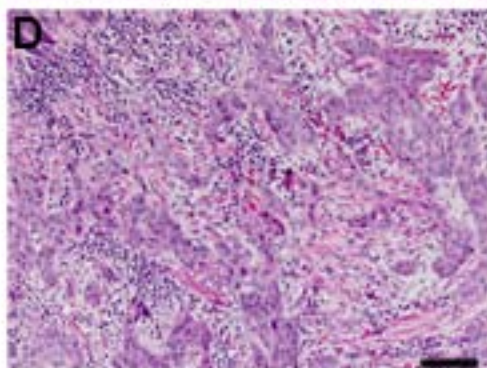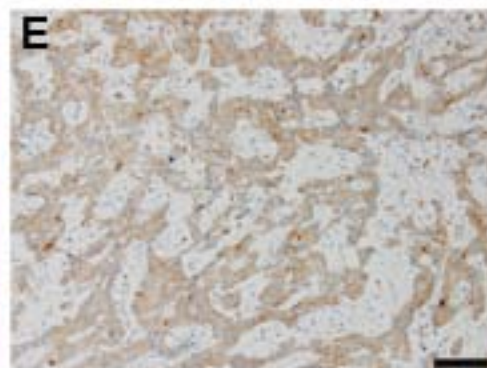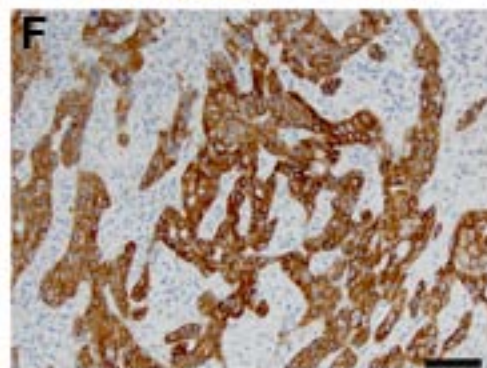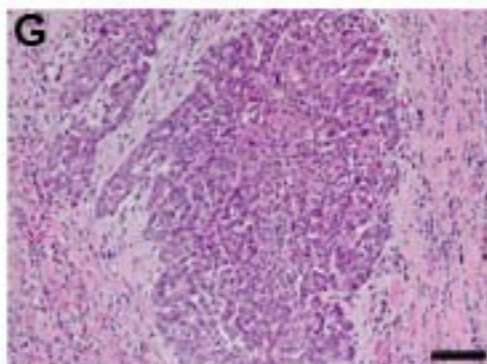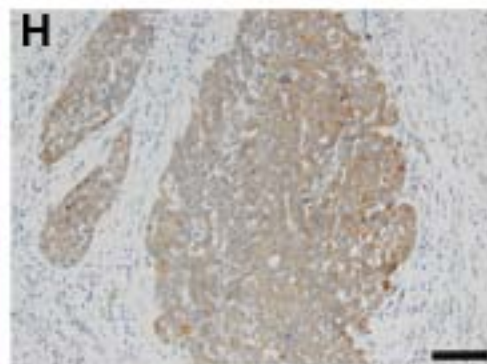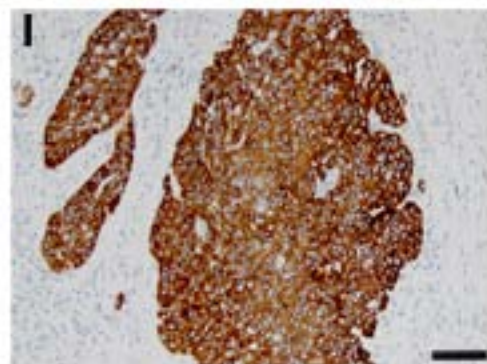

Supplement: mmc1.pdf [file mmc1.pdf]
